# Supplementary material for: El progresivo divorcio entre el mundo real y el mundo financiero
Source: MDPI journal article supplement (doi:10.3390/v13040556), 1988-01-01
Supplement: s1 [file s1]

Table S1. Reported influenza-like illness cases in Bialystok and Bialystok County divided by year and by age group.

| Age \ Year   | 2013          | 2014          | 2015          | 2016          | 2017          | 2018          | 2019          | 2013-2019      |
|--------------|---------------|---------------|---------------|---------------|---------------|---------------|---------------|----------------|
|              |               |               |               |               |               |               |               |                |
| <b>0-4</b>   | 11,092        | 8,982         | 10,041        | 14,794        | 16,092        | 10,606        | 10,396        | <b>82,003</b>  |
| <b>5-14</b>  | 10,574        | 7,869         | 9,084         | 14,064        | 14,350        | 10,038        | 7,267         | <b>73,246</b>  |
| <b>15-64</b> | 25,332        | 16,376        | 18,966        | 27,674        | 31,900        | 22,752        | 16,559        | <b>159,559</b> |
| <b>65+</b>   | 4,716         | 2,563         | 3,224         | 4,975         | 6,226         | 5,711         | 3,764         | <b>31,179</b>  |
| <b>Total</b> | <b>51,714</b> | <b>35,790</b> | <b>41,315</b> | <b>61,507</b> | <b>68,568</b> | <b>49,107</b> | <b>37,986</b> | <b>345,987</b> |

Table S2. Annual and 24-hour concentrations of particulate matter ( $\mu\text{g}/\text{m}^3$ ) in Białystok and the Białystok County.

|      |                   |             |      | 24-hour concentrations |      |        |      |       |                              |               |
|------|-------------------|-------------|------|------------------------|------|--------|------|-------|------------------------------|---------------|
| Year |                   | Annual mean | SD   | Min                    | P25  | Median | P75  | Max   | n (%) > WHO daily guidelines | n (%) missing |
| 2013 | PM <sub>2.5</sub> | 22.9        | 11.1 | 3.8                    | 15.2 | 20.3   | 28.1 | 75.2  | 122 (35%)                    | 21 (6%)       |
|      | PM <sub>10</sub>  | 23.2        | 13.7 | 3.9                    | 13.9 | 20.3   | 28.8 | 96.5  | 13 (4%)                      | 0             |
| 2014 | PM <sub>2.5</sub> | 24.9        | 11.7 | 5.9                    | 16.0 | 22.9   | 32.8 | 69.7  | 151 (42%)                    | 4 (1%)        |
|      | PM <sub>10</sub>  | 26.5        | 15.8 | 5.8                    | 15.2 | 22.1   | 33.3 | 97.1  | 30 (8%)                      | 0             |
| 2015 | PM <sub>2.5</sub> | 24.9        | 14.7 | 6.1                    | 15.0 | 19.9   | 31.6 | 91.0  | 125 (36%)                    | 16 (5%)       |
|      | PM <sub>10</sub>  | 25.3        | 18.1 | 4.7                    | 13.1 | 19.6   | 30.4 | 115.4 | 40 (11%)                     | 0             |
| 2016 | PM <sub>2.5</sub> | 19.8        | 9.1  | 3.3                    | 12.9 | 18.1   | 25.2 | 65.2  | 77 (26%)                     | 65 (22%)      |
|      | PM <sub>10</sub>  | 20.2        | 12.5 | 1.7                    | 11.8 | 16.7   | 24.7 | 86.9  | 12 (3%)                      | 0             |
| 2017 | PM <sub>2.5</sub> | 21.0        | 12.9 | 2.7                    | 12.9 | 17.9   | 25.8 | 129.7 | 92 (27%)                     | 23 (7%)       |
|      | PM <sub>10</sub>  | 20.2        | 14.4 | 2.7                    | 11.5 | 17.0   | 24.2 | 139.1 | 12 (3%)                      | 0             |
| 2018 | PM <sub>2.5</sub> | 24.0        | 13.3 | 2.4                    | 14.2 | 21.4   | 29.9 | 88.4  | 132 (37%)                    | 9 (3%)        |
|      | PM <sub>10</sub>  | 22.1        | 14.6 | 2.8                    | 11.9 | 18.2   | 27.9 | 97.4  | 19 (5%)                      | 1 (<1%)       |
| 2019 | PM <sub>2.5</sub> | 19.0        | 9.3  | 2.9                    | 12.8 | 17.6   | 22.3 | 64.4  | 68 (19%)                     | 3 (1%)        |
|      | PM <sub>10</sub>  | 18.6        | 10.1 | 2.7                    | 11.8 | 16.8   | 22.5 | 91.2  | 3 (1%)                       | 0             |

Abbreviations: PM<sub>2.5</sub>, particulate matter with aerodynamic diameters of 2.5  $\mu\text{m}$  or less; PM<sub>10</sub>, particulate matter with aerodynamic diameters of 10  $\mu\text{m}$  or less; SD, standard deviation

Table S3. Spearman's correlation coefficients between the environmental factors and the incidence of influenza-like illness.

|                                        | Number of cases | Temperature (°C)                                                                  | Relative humidity (%)                                                             | Absolute humidity (g/m <sup>3</sup> )                                             | Wind speed (m/s)                                                                  | Precipitation (mm)                                                                 | Precipitation duration (hours)                                                      | Sunshine duration (hours)                                                            | PM <sub>2.5</sub> (µg/m <sup>3</sup> )                                                | PM <sub>10</sub> (µg/m <sup>3</sup> )                                                 |
|----------------------------------------|-----------------|-----------------------------------------------------------------------------------|-----------------------------------------------------------------------------------|-----------------------------------------------------------------------------------|-----------------------------------------------------------------------------------|------------------------------------------------------------------------------------|-------------------------------------------------------------------------------------|--------------------------------------------------------------------------------------|---------------------------------------------------------------------------------------|---------------------------------------------------------------------------------------|
| Number of cases                        | -               | 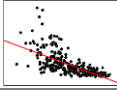 |  |  |  |  |  |   |    |    |
| Temperature (°C)                       | -0.78 ***       | -                                                                                 |  |  |  |  |  |   |    |    |
| Relative humidity (%)                  | 0.33 ***        | -0.5 ***                                                                          | -                                                                                 |  |  |  |  |   |    |    |
| Absolute humidity (g/m <sup>3</sup> )  | -0.77           | 0.97                                                                              | -0.29                                                                             | -                                                                                 |  |  |  |   |    |    |
| Wind speed (m/s)                       | 0.43 ***        | -0.52 ***                                                                         | 0.13 *                                                                            | -0.54 ***                                                                         | -                                                                                 |  |  |   |    |    |
| Precipitation (mm)                     | -0.15 **        | 0.15 **                                                                           | 0.23 ***                                                                          | 0.25 ***                                                                          | NS                                                                                | -                                                                                  |  |   |    |    |
| Precipitation duration (hours)         | 0.42 ***        | -0.55 ***                                                                         | 0.61 ***                                                                          | -0.43 ***                                                                         | 0.39 ***                                                                          | 0.58 ***                                                                           | -                                                                                   |  |   |   |
| Sunshine duration (hours)              | -0.57 ***       | 0.75 ***                                                                          | -0.82 ***                                                                         | 0.62 ***                                                                          | -0.43 ***                                                                         | -0.17 **                                                                           | -0.73 ***                                                                           | -                                                                                    |  |  |
| PM <sub>2.5</sub> (µg/m <sup>3</sup> ) | 0.4 ***         | -0.34 ***                                                                         | NS                                                                                | -0.37 ***                                                                         | NS                                                                                | -0.51 ***                                                                          | -0.2 ***                                                                            | NS                                                                                   | -                                                                                     |  |
| PM <sub>10</sub> (µg/m <sup>3</sup> )  | 0.51 ***        | -0.54 ***                                                                         | 0.22 ***                                                                          | -0.55 ***                                                                         | NS                                                                                | -0.46 ***                                                                          | NS                                                                                  | -0.29 ***                                                                            | 0.92 ***                                                                              | -                                                                                     |

Abbreviations: PM<sub>2.5</sub>, particulate matter with aerodynamic diameters of 2.5 µm or less; PM<sub>10</sub>, particulate matter with aerodynamic diameters of 10 µm or less

\* indicates  $p < 0.05$ ; \*\* indicates  $p < 0.01$ ; \*\*\* indicates  $p < 0.001$ ;

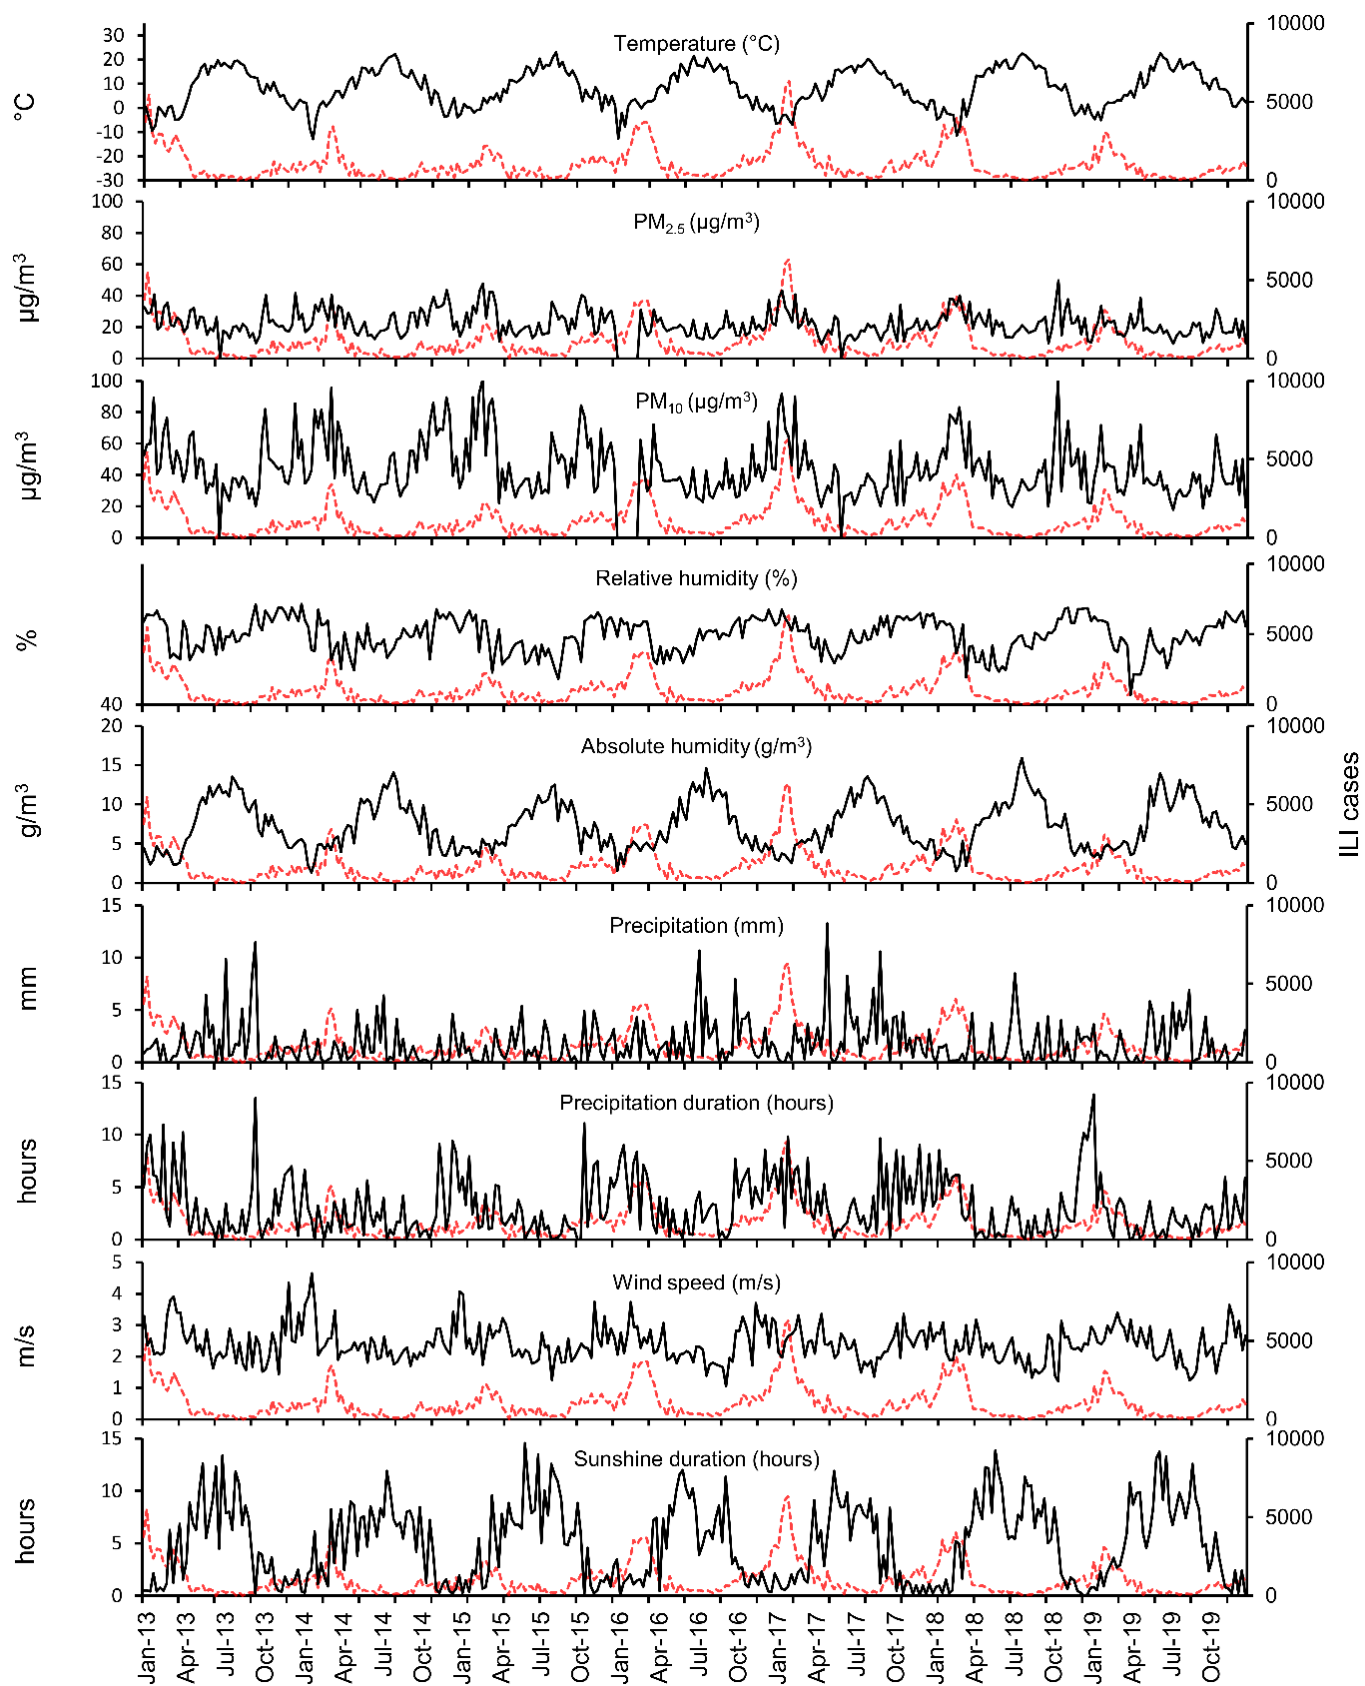

Figure S1. The number of weekly influenza-like cases (red dotted lines) plotted against meteorological and air pollution data (black lines) from Białystok, Poland, from January 2013 – December 2019. Abbreviations: PM<sub>2.5</sub>, particulate matter with aerodynamic diameters of 2.5 µm or less; PM<sub>10</sub>, particulate matter with aerodynamic diameters of 10 µm or less; ILI, influenza-like illness

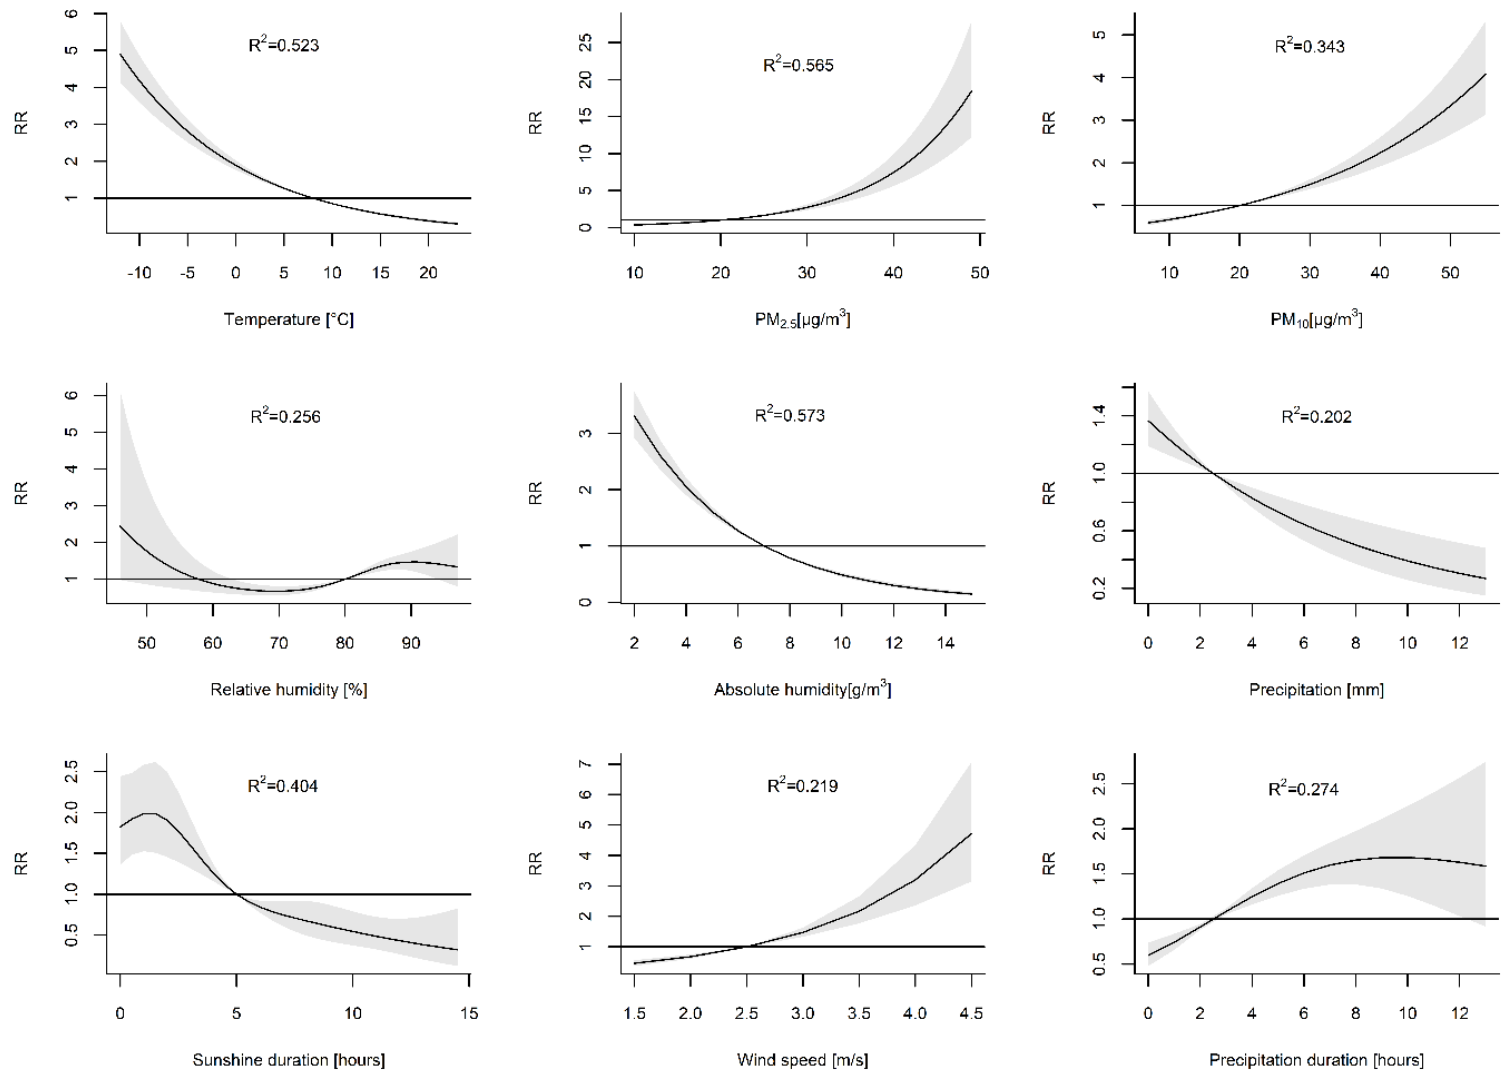

Figure S2. The association between environmental factors and the relative risk (RR) with 95% confidence interval (CI) of influenza-like illness. The analysis was performed for each environmental factor separately. The reference levels were defined as the median values of each of the analyzed variables to calculate RRs. Abbreviations:  $\text{PM}_{2.5}$ , particulate matter with aerodynamic diameters of 2.5  $\mu\text{m}$  or less;  $\text{PM}_{10}$ , particulate matter with aerodynamic diameters of 10  $\mu\text{m}$  or less

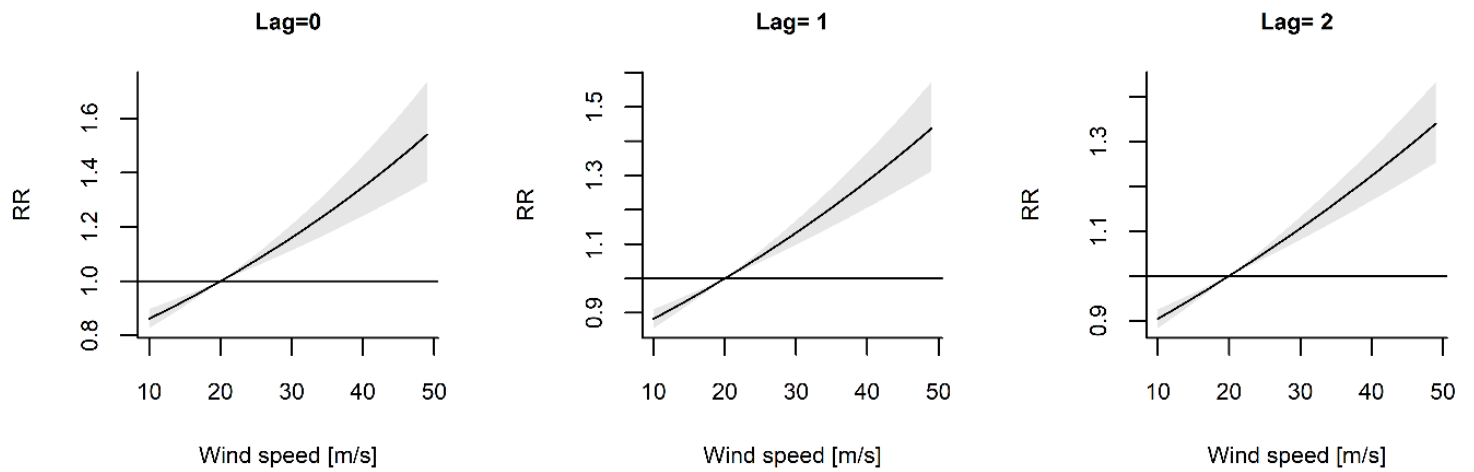

Figure S3. The association between wind speed and the relative risk (RR) of the incidence of influenza-like illness is shown as the estimated exposure-lag-response curves for lags of 0 to 2 weeks with 95% confidence intervals. The model was adjusted for the PM<sub>2.5</sub> concentration and a long-term trend.
